# Supplementary material for: Application of a 21-Gene Recurrence Score in a Swiss Single-Center Breast Cancer Population: A Comparative Analysis of Treatment Administration before and after TAILORx
Source: MDPI journal article supplement (doi:10.3390/diagnostics14010097), 2023-12-31
Supplement: s1 [file s1]

# Application of a 21-Gene Recurrence Score in a Swiss Single-Center Breast Cancer Population: A Comparative Analysis of Treatment Administration before and after TAILORx

## Supplementary Material

**Table S1. Main differences in treatment administration and therapy-associated complications, in the two populations, before (A) and after (B) publication of TAILORx study**

|                                                    | Cohort A        | Cohort B        | p-value |
|----------------------------------------------------|-----------------|-----------------|---------|
| <b>Treatment administration</b>                    |                 |                 |         |
| Surgery                                            | 165             | 161             | 0.352   |
| Breast Conservative                                | 113 (68%)       | 108 (67%)       |         |
| Mastectomy                                         | 47 (32%)        | 53 (33%)        |         |
| Postoperative Complications                        | 21 (13%)        | 18 (11%)        | 0.764   |
| Reconstruction                                     | 28/47 (60%)     | 29/53 (55%)     | 0.679   |
| Radiotherapy (RT)                                  | 128 (78%)       | 123 (76%)       | 0.223   |
| RT Complications                                   | 3 (2%)          | 1 (0.8%)        | 0.86    |
| Dose RT                                            | 54.99 (SD 8.31) | 52.35 (SD 7.88) | 0.417   |
| Adjuvant CHT                                       | 31 (19%)        | 35 (22%)        | 0.763   |
| CHT in patients ≤ 50 years old                     | 7/40 (17.5%)    | 16/53 (30%)     | <0.001  |
| CHT in patients ≥ 51 years old                     | 24/125 (19%)    | 20/108 (19%)    | 0.664   |
| CHT in patients with RS 11-20                      | 5 (6%)          | 9 (13%)         | 0.449   |
| CHT in patients with RS 21-25                      | 9 (35%)         | 4 (17%)         | 0.743   |
| CHT in patients with RS 26-30                      | 9 (75%)         | 7 (78%)         | 0.284   |
| CHT in patients with RS >30                        | 8 (57%)         | 14 (78%)        | 0.252   |
| CHT Refusal                                        | 15 (9%)         | 6 (3.7%)        | 0.042   |
| Osteo-oncologic Treatment                          | 67 (41%)        | 72 (45%)        | 0.695   |
| <b>TB Treatment Recommendation according to RS</b> |                 |                 |         |
| ET+CHT total (%)                                   | 51 (31%)        | 48 (30%)        | 0.865   |
| CHT-ET TB Recommendation in RS 0-10                | 1/31 (3%)       | 0/37 (0%)       |         |

|                                      |              |              |       |
|--------------------------------------|--------------|--------------|-------|
| CHT-ET TB Recommendation in RS 11-25 | 23/106 (22%) | 16/97 (17%)  |       |
| CHT-ET (RS >26)                      | 28/28 (100%) | 27/27 (100%) |       |
| ET alone TB Recommendation           | 116 (70%)    | 117 (73%)    | 0.712 |
| ET                                   | 155 (94%)    | 152 (94%)    | 0.229 |
| ET Refusal                           | 6 (3.8%)     | 9 (5.6%)     | 0.429 |

RS = Recurrence Score; ET = Endocrine Therapy; TB = Tumor Board; RT = Radiotherapy; CHT = Chemotherapy; SD = Standard Deviation. Note: Percentages were rounded.

**Table S2. Administration of CHT-ET vs. ET alone before (cohort A) and after (cohort B) publication of TAILORx findings.**

|                           | CHT-ET Administration |          |            | ET Administration |           |            |
|---------------------------|-----------------------|----------|------------|-------------------|-----------|------------|
|                           | A (%)                 | B (%)    | Change (%) | A (%)             | B (%)     | Change (%) |
| <b>Total</b>              | 31 (19%)              | 35 (22%) | + 3%       | 158 (96%)         | 152 (94%) | -2%        |
| <b>Age ≤ 50 years old</b> | 7 (17.5%)             | 16 (30%) | +12.5%     | 38 (95%)          | 53 (98%)  | +3%        |
| <b>Age ≥ 51 years old</b> | 24 (19%)              | 20 (19%) | 0%         | 121 (96%)         | 99 (93%)  | -3%        |
| <b>N0</b>                 | 14 (15%)              | 16 (17%) | +3%        | 90 (95%)          | 89 (95%)  | 0%         |
| <b>N1</b>                 | 17 (25%)              | 19 (28%) | +3%        | 67 (100%)         | 64 (96%)  | -4%        |
| <b>Grade 3</b>            | 18 (29%)              | 20 (31%) | +2%        | 21 (42%)          | 50 (100%) | 58%        |
| <b>Lobular</b>            | 4 (14%)               | 6 (24%)  | +10%       | 26 (90%)          | 23 (92%)  | +2%        |
| <b>Ki-67</b>              | 16 (31%)              | 20 (31%) | 0%         | 50 (96%)          | 61 (95%)  | -1%        |

CHT = Chemotherapy; ET = Endocrine Therapy. Note: Percentages were rounded.

**Table S3. Logistic Regression model for association of patient, tumor, and treatment characteristics with chemo-endocrine therapy in cohort A (before TAILORx) and cohort B (after TAILORx)**

| Cohort A                                   |                     |         |
|--------------------------------------------|---------------------|---------|
|                                            | OR (95% CI)         | p-Value |
| <b>Age</b>                                 | 1.05 (1.01 – 1.11)  | 0.03    |
| <b>Age &lt;50/&gt;50</b>                   | 0                   | 0.998   |
| <b>N0/+</b>                                | 3.32 (1.09 – 10.06) | 0.034   |
| <b>Grade 3 vs. G1/2</b>                    | 0.4 (0.14 – 1.12)   | 0.082   |
| <b>Ki-67% high/low (&lt;20% vs. ≥ 20%)</b> | 2.15 (0.74 – 6.29)  | 0.162   |
| <b>Tumor stage (T2/3 vs. T1)</b>           | 0.97 (0.95 – 1)     | 0.043   |
| <b>RS 18-30</b>                            | 0.12 (0.03 – 0.43)  | 0.001   |
| <b>RS&gt;31</b>                            | 0.04 (0.01 – 0.21)  | <0.001  |
| Cohort B                                   |                     |         |
|                                            | OR (95% CI)         | p-value |
| <b>Age</b>                                 | 0.89 (0.84 – 0.94)  | <0.001  |

|                                 |                    |       |
|---------------------------------|--------------------|-------|
| Age <50/>50                     | 0.79 (0.11 – 5.92) | 0.818 |
| N0/+                            | 3.31 (1.29 – 8.53) | 0.013 |
| Grade 3 vs. G1/2                | 0.79 (0.27 – 2.26) | 0.654 |
| Ki-67 high/low (<20% vs. ≥ 20%) | 1.1 (0.39 – 3.13)  | 0.853 |
| Tumor Size (T2/3 vs. T1)        | 0.99 (0.96 – 1.01) | 0.357 |
| RS 11-25                        | 0.76 (0.21 – 2.76) | 0.678 |
| RS >26                          | 1.31 (0.36 – 4.76) | 0.678 |

CHT = Chemotherapy; RS = Recurrence Score; N0/+ = nodal status; SD = Standard Deviation; OR = Odds Ratio; CI = Confidence Interval

**Table S4. Chemotherapy administration in the whole study population according to patients and tumor characteristics.**

|                                  | SD   | p-Value | Odds Ratio (OR) | 95% Confidence Interval |
|----------------------------------|------|---------|-----------------|-------------------------|
| Age                              | 0.02 | 0.001   | 0.93            | 0.89-0.97               |
| Age ≤50 />50 years old           | 0.33 | 0.367   | 1.35            | 0.7 - 2.59              |
| Cohort A/Cohort B                | 0.46 | 0.102   | 0.47            | 0.19-1.16               |
| Comorbidities Yes/No             | 0.45 | 0.626   | 1.24            | 0.52-2.99               |
| pT                               | 0.35 | 0.086   | 1.81            | 0.92-3.56               |
| pN                               | 0.44 | <0.001  | 4.77            | 2.03-11-22              |
| Lobular/Ductal Histology         | 0.32 | 0.12    | 0.61            | 0.33-1.14               |
| Ki-67 ≤20%/>20%                  | 0.49 | 0.291   | 0.6             | 0.23-1.55               |
| Grade 2                          | 0.46 | 0.376   | 0.67            | 0.27-1.63               |
| Grade 3                          | 0.45 | 0.473   | 1.39            | 0.57 - 3.38             |
| Oncotype RS low (0-10)           | 1.2  | <0.001  | 0               | 0-0.02                  |
| Oncotype RS intermediate (11-25) | 0.58 | <0.001  | 0.02            | 0.01-0.07               |
| Oncotype RS high (≥26)           | 1.21 | <0.001  | 617.93          | 57.97 - 6587.16         |

CHT = Chemotherapy; RS = Recurrence Score; N0/+ = nodal status; SD = Standard Deviation; OR = Odds Ratio; CI = Confidence Interval

**Table S5. Main treatment strategies and outcomes in the intermediate RS (11-25) node negative population before and after publication of TAILORx study**

|                    | Cohort A | Cohort B | p-value |
|--------------------|----------|----------|---------|
| Number of patients | 66 (62%) | 58 (60%) |         |
| Menopause          | 51 (77%) | 38 (66%) | 0.206   |
| Age ≤ 50 years old | 15 (23%) | 19 (33%) | 0.338   |

|                                        |                                                          |                                                          |        |
|----------------------------------------|----------------------------------------------------------|----------------------------------------------------------|--------|
| Age ≥ 51 years old                     | 51 (77%)                                                 | 39 (67%)                                                 | 0.205  |
| Surgery                                |                                                          |                                                          |        |
| Breast conservative                    | 50 (76%)                                                 | 37 (64%)                                                 | 0.114  |
| No surgical reconstruction             | 28 (42%)                                                 | 29 (50%)                                                 | 0.69   |
| CHT                                    | 6 (9%)                                                   | 3 (5%)                                                   | 0.49   |
| CHT refusal                            | 5 (45%)                                                  | 0 (0%)                                                   |        |
| CHT in premenopausal women with RS >16 | 1 (16%)                                                  | 2 (67%)                                                  |        |
| RT                                     | 46 (70%)                                                 | 40 (69%)                                                 | 0.969  |
| RT refusal                             | 4 (8%)                                                   | 2 (5%)                                                   | 0.904  |
| Mean RT Dose                           | 54.14 (SD 6.8, IQR 9.52)                                 | 50.31 (SD 7.16, IQR 2.8)                                 | 0.021  |
| ET                                     | 62 (94%)                                                 | 52 (90%)                                                 | 0.326  |
| ET refusal                             | 3 (5%)                                                   | 6 (10%)                                                  |        |
| Osteo-oncologic treatment              | 29 (44%)                                                 | 23 (40%)                                                 | 0.91   |
| Relapse                                | 4 (6%)                                                   | 2 (3%)                                                   | 0.516  |
| Death                                  | 2 (3%)                                                   | 0 (0%)                                                   |        |
| Mean Follow-up (months)                | 60.52 (SD 22.03, IQR 27)<br>Range: [4-108]<br>Median: 61 | 18.5 (SD 11.47, IQR 16.5)<br>Range: [1-41]<br>Median: 17 | <0.001 |
| TB Implementation                      | 50 (76%)                                                 | 48 (83%)                                                 | 0.919  |

CHT = Chemotherapy; RS = Recurrence Score; RT = Radiotherapy; ET = Endocrine Therapy; TB = Tumor Board; SD = Standard Deviation. Note: Percentages were rounded.

**Table S6. Association of chemotherapy administration according to age and RS**

| Cohort A                       | SD   | p-Value | OR   | 95% CI      |
|--------------------------------|------|---------|------|-------------|
| Age ≤ 50 years old             | 0.11 | 0.835   | 1.02 | 0.83 – 1.26 |
| RS for Patients ≤ 50 years old | 0.13 | 0.009   | 0.75 | 0.56 – 0.92 |
| Age ≥ 51 years old             | 0.05 | 0.006   | 1.13 | 1.04 – 1.24 |
| RS for Patients ≥ 51 years old | 0.04 | <0.001  | 0.81 | 0.74 – 0.88 |
|                                |      |         |      |             |
| Cohort B                       | SD   | p-Value | OR   | 95% CI      |
| Age ≤ 50 years old             | 0.07 | 0.552   | 0.96 | 0.84 – 1.1  |
| RS for Patients ≤ 50 years old | 0.08 | 0.001   | 1.29 | 1.11 – 1.49 |
| Age ≥ 51 years old             | 0.05 | <0.001  | 0.81 | 0.74 – 0.89 |
| RS for Patients ≥ 51 years old | 0.04 | 0.132   | 1.06 | 0.98 – 1.14 |

CHT = Chemotherapy; RS = Recurrence Score; SD = Standard Deviation; OR = Odds Ratio; CI = Confidence Interval
